# Supplementary material for: TREC-Rio trial: a randomised controlled trial for rapid tranquillisation for agitated patients in emergency psychiatric rooms [ISRCTN44153243]
Source: Springer Nature journal article supplement (doi:10.1186/1471-244x-2-11), 2002-10-16
Supplement: Additional file 1 [file 1471-244x-2-11-s1.doc]

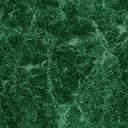


**Appendix 1. Information letter**

**Appendix 1. TREC-Rio information for relatives**

Dear Relative or Friend

RE: TREC study (Tranquilização Rápida-Ensaio Clínico).

This hospital is taking part in the TREC study - helping to identify the very best treatment for agitated or aggressive people in an emergency situation. All drug treatments used in this hospital are safe, efficient, well established and familiar to the doctors and nurses. No one, anywhere in the world, knows which is the very best drug to use for the emergency situation in terms of speed of onset and recovery. Hospitals in Rio de Janeiro are working together to help answer this question.

Once it is clear that your friend/relative is so disturbed/unwell that medication is needed, and the doctor looking after their care thinks them to be eligible for the TREC study, they are given one of two short acting sedating drug treatments (haloperidol+prometazine or midazolam). The choice of the treatment is made in fair, random, way, as in a lottery.

Participation in the study does not involve additional tests or examinations and everyone will receive the best care available. The TREC study has been approved by the Ethical Committee of XXXXXXX.

If you want additional information, get in touch with TREC Collaborator in this hospital (Dr XXXXXX).

Thank you.

Dr Gisele Huf

TREC Co-ordinator

| **Appendix 2. TREC-Box form - completed blind to treatment of allocation**  **Appendix 2. TREC-BOX entry form - completed blind to treatment of allocation** |  | TREC Entry form | | | | |  |
| --- | --- | --- | --- | --- | --- | --- | --- |
|  |  |  |
| Please answer the questions before you open the box, and leave the completed box in a TREC cupboard | | | | | | | |
|
|  |  |  |  |  |  |  |  |
|  | TREC Number | |  |  | |  |  |
|  |  |  |  |  |  |  |  |
|  | Bulletin/medical notes number | |  |  | |  |  |
|  |  |  |  |  |  |  |  |
|  | Patient's name | |  |  | | |  |
|  |  |  |  |  | | |  |
|  | How disturbed is this person? | | |  |  | Number (choose only one option) | |
|  |  |  |  |  |
|  |  |  |  |  |  |  |  |
|  |  | 1. Moderately 2. Markedly 3. Extremely | | 4. One of the most disturbed people you have seen 5. Other – please describe | | | |
|  |  |
|  |  |
|  |  |  |  |  |  |  |  |
|  |  |  | | | | |  |
|  |  |  |  |  |  |  |  |
|  | In your opinion, which the primary cause for this episode? | | |  |  | Number (choose only one option) | |
|  |  |  |  |  |  |  |  |
|  |  | 1. Psychosis 2. Intoxication 3. Dementia 4. Mental retardation | | | 5. Other organic problem. Which one? 6. Psychological distress 7. Unknown 8. Other. Which one? | | |
|  |  |
|  |  |
|  |  |
|  |  |
|  |  | Further details | | | | |  |
|  |  |  |  |  |  |  |  |
|  | Time of completing this form | | |  |  |  |  |
| Signature |  |  |  |  | hh | mm |  |
|  |  |  |  |  |  |  |  |

| **Mark all that apply** | | | | | | | |
| --- | --- | --- | --- | --- | --- | --- | --- |
|  | **Calm or tranquil?** | **Asleep?** | **Additional medicaiton?** | **Restrained?** | **Important adverse effects?** | **Not seen?** | **Left the emergency room?** |
| 20 minutes after TREC medication |  | | | | | | |
| 40 minutes after TREC medication |  | | | | | | |
| 60 minutes after TREC medication |  | | | | | | |
| 2 hours after TREC medication |  | | | | | | |

## Time of administration

Hour Minutes

**Appendix 3. Primary outcome form**

# Full Name TREC number Medical no.

Have important adverse effects occured? Yes No

If 'Yes', please describe which occured, and when.

Name:

Signature:

Other comments


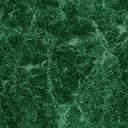


# TREC number

When the person arrives in the Emergency Room observe the situation.

When the person is given the TREC medication start the watch.

**Appendix 4. Primary outcome validation form**

## Time TREC medication was given

**Time person was tranquilised**

Tranquilisation = when you feel the person is peaceful (whether asleep or not).

**Time person fell asleep**

**Any other comments**


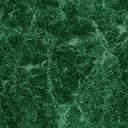


**Appendix 5. Serious adverse event form**

# TREC number

**Appendix 5. Serious event form**

This form should be used to immediately notify the TREC Co-ordinator of any events that are serious and unexpected.

## Details of unexpected serious event – when started, when ended, management, outcome

**Patient’s name** **Hospital name**

**Name of responsible clinician Bulletin or notes number**

### Signature of person completing form Date form completed

###

Please fax the completed form to the TREC Co-ordinating Centre.

If fax is not possible, please communicate as soon as possible the local collaborator.

Thank you

#### Dr Gisele Huf

TREC Co-ordinator

ADDRESS

TEL: XXXXX

FAX: XXXXXX

E-mail: trec@ensp.fiocruz.br

| **Appendix 6. TREC-Rio Main data collection form** |  |  | **Data transcription form** | | | | |  |
| --- | --- | --- | --- | --- | --- | --- | --- | --- |
|  | **Initial data** | | | | | | | |
|  | Date of collection | |  |  |  |  |  |  |
|  |  |  |  | day | month | year |  |  |
|  | Time of collection | |  |  |  |  |  |  |
|  |  |  |  | hour | minutes |  |  |  |
|  | TREC number | |  |  | |  |  |  |
|  |  |  |  |  |  |  |  |  |
|  | ER / medical notes number | |  |  | | |  |  |
|  |  |  |  |  |  |  |  |  |
|  | Patient's name | |  |  | | | | |
|  |  |  |  |  | | | | |
|  | Sex |  |  |  |  |  |  |  |
|  |  |  |  | M / F |  |  |  |  |
|  | Date of birth | |  |  |  |  |  |  |
|  | or |  |  | day | month | year |  |  |
|  | approximate age | |  |  | years |  |  |  |
|  |  |  |  |  |  |  |  |  |
|  | Cause of agitation | |  |  | Transcribe the number on the TREC box | | |  |
|  |  |  |  |  |  |  |  |  |
|  | Severity of agitation | |  |  | Transcribe the number on the TREC box | | |  |
|  |  |  |  |  |  |  |  |  |
|  | Date TREC box was opened | |  |  |  |  |  |  |
|  |  |  |  | day | month | year |  |  |
|  | Time TREC box was opened | |  |  |  |  |  |  |
|  |  |  |  | hour | minutes |  |  |  |
|  | Name of person who opened the TREC box | |  |  | | | | |

|  | TREC drug(s) | |  |  |  |  |  |  |
| --- | --- | --- | --- | --- | --- | --- | --- | --- |
|  |  |  |  | H+P / M |  |  |  |  |
|  | **Drug(s) given during the first 24 hours** | | | | | | | |
|  |  |  |  |  |  |  |  |  |
|  | Name of drug | |  | Dose | Route of administration* | | Time | |
|  |  | | |  |  | |  |  |
|  |  |  |  |  |  | | hour | minutes |
|  |  | | |  |  | |  |  |
|  |  |  |  |  |  |  | hour | minutes |
|  |  | | |  |  | |  |  |
|  |  |  |  |  |  |  | hour | minutes |
|  |  | | |  |  | |  |  |
|  |  |  |  |  |  |  | hour | minutes |
|  |  | | |  |  | |  |  |
|  |  |  |  |  |  |  | hour | minutes |
|  |  | | |  |  | |  |  |
|  |  |  |  |  |  |  | hour | minutes |
|  |  | | |  |  | |  |  |
|  |  |  |  |  |  |  | hour | minutes |
|  |  | | |  |  | |  |  |
|  |  |  |  |  |  |  | hour | minutes |
|  |  | | |  |  | |  |  |
|  |  |  |  |  |  |  | hour | minutes |
|  |  | * If oral, register only the time of first administration and the frequency that the drug was to be given, eg. Twice/day or four times/ day | | | | | | |
|  |  | | | | | | | |
|  | Were oral drugs refused in the first 24 hours? | | | |  | Yes / No / Not applicable (not perscribed oral medication) | | |
|  |  |  |  |  |  |  |  |  |
| All these data should be on the perscription form. Is there anything you want to add? Please note it here. | | | | | | | | |
|
|
|
|

|  | TREC Number | |  |  | |  |  |  |
| --- | --- | --- | --- | --- | --- | --- | --- | --- |
|  |  |  |  |  |  |  |  |  |
|  | First psychiatric attendance? | |  |  |  |  |  |  |
|  |  |  |  | Yes / No / Unknown |  |  |  |  |
|  | Already on antipsychotics? | |  |  |  |  |  |  |
|  |  |  |  | Yes / No / Unknown |  |  |  |  |
|  | Where did the 11atient go immediately after administration of TREC drugs? | | |  |  |  |  |  |
|  |  | Diagnostic bed – 1 Ward of this hospital – 2 Ward of another hospital – 3 Non-psychiatric hospital – 4 | | | | Back to the care of family/friends – 5 AWOL – 7 None applies – 8 | | |
|  |  |  |  |  |  |  |  |  |
|  |  | In case of ‘Ward of another hospital’, which hospital? | | |  |  | |  |
|  |  |  |  |  |  |  |  |  |
|  |  | In case of ‘AWOL’, at what time did the patient go AWOL? | | |  |  |  |  |
|  |  |  |  |  |  | Hour | minutes |  |
|  | In first the 24 hours after the use of TREC drugs, was the doctor was called to see the patient? | | |  |  |  |  |  |
|  |  | Yes / No / Unknown |  |  |  |
|  |  |  |  |  |  |  |  |  |
|  | Have important adverse reactions been registered on the notes or chart within the first 24 hours? | | |  |  |  |  |  |
|  |  | Yes / No / Unknown |  |  |  |

|  |  |  |  |  |  |  |  |  |
| --- | --- | --- | --- | --- | --- | --- | --- | --- |
|  | If they have been registered… | | |  |  |  |  |  |
|  |  | Type of reaction | |  | Approximate time | |  |  |
|  |  |  | |  |  |  |  |  |
|  |  |  |  |  | hour | minutes |  |  |
|  |  |  | |  |  |  |  |  |
|  |  |  |  |  | hour | minutes |  |  |
|  |  |  | |  |  |  |  |  |
|  |  |  |  |  | hour | minutes |  |  |
|  |  | How were the adverse effects managed? | | | | | | |
|  |  |
|  |  |
|  |  |
|  |  |
|  |  |
|  |  |
|  |  |
|  |  |
|  |  |
|  |  |
|  |  |
|  |  |
|  |  |
|  |  |
|  |  |
|  |  |
|  |  |
|  |  |
|  |  |  |  |  |  |  |  |  |
| All this information should be in the notes or ER chart. If there is anything you would like to add, please write it here. | | | | | | | | |

|  |  |  |  |  |  | Which one? | | |
| --- | --- | --- | --- | --- | --- | --- | --- | --- |
|  |  | Do the notes record a diagnosis for this episode? | | |  |  | | |
|  |  |  |  |  |  |  |  |  |
|  |  | Were there other episodes of aggressiveness in first the 24 hours? | | |  |  |  |  |
|  |  |  |  |  |  | Yes / No |  |  |
|  |  | If so…. |  |  |  |  |  |  |
|  |  |  |  | day | month |  | hour | minutes |
|  | ANY OTHER COMMENTS? | | | |  |  |  |  |
|  |  |  | | | | | | |
|  |  |
|  |  |
|  |  |
|  |  |
|  |  |
|  |  |
|  |  |
|  |  |
|  |  |
|  |  |
|  |  |
|  |  |
|  |  |
|  |  |
|  |  |
|  |  |
|  |  |
|  |  |  |  |  |  |  |  |  |
| Please, staple this to the primary outcome form, and give it to Dr Gisele Huf.   Thank you. | | | | | | | | |
|
|
|
|
|
|  |  |  |  |  |  |  |  |  |

### Appendix 7. DUMMY TABLES

Dummy table A. Characteristics of patients at trial entry

|  | **Haloperidol + Promethazine**  **(n = …)** | **Midazolam**  **(n = …)** |
| --- | --- | --- |
| **Mean age (SD)** |  |  |
| **Male / female** |  |  |
| **First psychiatric attendance**  Yes  No  Unknown |  |  |
| ***Severity of disturbance - first impression**  moderately  markedly  severely  among the most extremely disturbed |  |  |
| ***Presumed cause for agitation**  Psychosis (schizophrenia or mania)  Substance abuse  Mental organic (dementia or oligophrenia)  Clinical organic (metabolic, hormones, etc)  Psychological  Unknown |  |  |

* before opening the TREC box

## Dummy table B. Compliance with the allocated treatment

|  | **Haloperidol + Promethazine**  **(n = …)** | **Midazolam**  **(n = …)** |
| --- | --- | --- |
| **Allocated treatment** |  |  |
| **Mean doses** |  |  |
| **Other drugs in the first 4 hs (doses?)** |  |  |
| None |  |  |
| Drug |  |  |
| Drug |  |  |
| **No allocated treatment** |  |  |
| **Drugs in the first 4 hs (by class and route of administ)** |  |  |
| None |  |  |
| Drug |  |  |
| Drug |  |  |
| **Immediate placement** |  |  |
| Transferred to ward |  |  |
| Left in company of family |  |  |
| Immediate AWOL |  |  |

**Dummy table C. Primary measures of outcome**

|  | **Haloperidol + Promethazine**  **(n = …)** | **Midazolam**  **(n = …)** |
| --- | --- | --- |
| **Tranquillisation** | | |
| % tranquilised   - by 20 minutes - by 40 minutes - by 60 minutes |  |  |

## Dummy table D. Secondary measures of outcome – first 24 hs

|  | **Haloperidol + Promethazine**  **(n = …)** | **Midazolam**  **(n = …)** |
| --- | --- | --- |
| **Tranquilissation** | | |
| % tranquillised after 2 hs | | |
|  | | |
| **Sleep** | | |
| Mean time to fall asleep (SD) |  |  |
| % asleep   - by 2 hours |  |  |
| **Physical restraints** | | |
| % needing physical restraints after TREC drugs |  |  |
| Mean time in physical restraints (SD) |  |  |
| **Further drugs (from 4 to 24 hs)** | | |
| Drugs used - by class and route of administration |  |  |
| Mean CPZ equivalent dose administered-mg (range) |  |  |
| Compliance with oral medication (first 24 hs) |  |  |
| % refusing oral medication |  |  |
| Adverse reactions |  |  |
| Acute dystonia Mental confusion  Akathisia (motor restlessness)  Problems with vital signs  Other |  |  |

Dummy table E. Clinical progress / service outcomes / 2 weeks

|  | **Haloperidol + Promethazine**  **(n = …)** | **Midazolam**  **(n = …)** |
| --- | --- | --- |
| **Diagnosis** |  |  |
| Diagnosis at 2 weeks or diagnosis at time of discharge, if that was before 2 weeks |  |  |
| **Length of stay – time to discharge** |  |  |
| % discharged   - by 1 week - by 2 weeks |  |  |
